# Supplementary material for: Geometry Shapes Evolution of Early Multicellularity
Source: PubMed Central journal article supplement (PMC4168977; doi:10.1371/journal.pcbi.1003803), 2014-09-18
Supplement: pcbi.1003803.s002.pdf [file pcbi.1003803.s002.pdf]

SUPPLEMENT: DYNAMIC PROGRAMMING RESULTS

In our model, clusters grow over  $T$  time steps and gravity selection then occurs. At the beginning of each time step, cluster division can occur. Following division, clusters grow, such that any cluster of size  $x$  cells will be  $G(x)$  cells by the end of the time step. Time point  $t = 0$  marks the beginning of the first time step and time  $t = T$  marks the point of gravity selection. Upon selection, a cluster of  $x$  cells survives with probability  $S(x)$ , which we take to be a non-decreasing function. The maximal reproductive output for a cluster of size  $x$  at time  $t$  is given by  $F(x, t)$ . For us, this output function is simply a means to determine the optimal way for clusters to split, which can depend on both size and time. In our scheme, a cluster of  $x$  cells can split into two clusters of sizes  $p$  and  $x - p$  (where  $0 \leq p \leq x/2$ ). Because it is possible for the cluster not to split (i.e., if  $p = 0$ ), we can simultaneously address the optimal rate of division along with optimal (a)symmetry.

A backwards recursion for maximal reproductive output can be formulated:

$$(1) \quad F(x, t) = \max_{0 \leq p \leq x/2} (F(G(p), t + 1) + F(G(x - p), t + 1))$$

Suppose that  $G(x) = ax$  (where  $a$  is an integer greater than unity) and  $F(x, t + 1)$  is concave. We note that  $F(x, t + 1)$  is only defined for integer values of  $x$ , so the standard requirement ( $\frac{d^2 F(x, t + 1)}{dx^2} \leq 0$ ) is replaced by the following condition:

$$(2) \quad (F(x + 1, t + 1) - F(x, t + 1)) - (F(x, t + 1) - F(x - 1, t + 1)) \leq 0$$

If condition 2 holds for all values of  $x$ , then we have the following proposition.

**Proposition**

Given that  $F(x, t + 1)$  is concave by condition 2; for all integer values of  $p$ , where  $0 \leq p \leq \frac{x}{2}$ :

$$(3) \quad F(ap, t + 1) + F(a(x - p), t + 1) \leq \begin{cases} 2F\left(\frac{ax}{2}, t + 1\right) & \text{if } x \text{ is even} \\ F\left(\frac{a(x+1)}{2}, t + 1\right) + F\left(\frac{a(x-1)}{2}, t + 1\right) & \text{if } x \text{ is odd} \end{cases}$$

**Proof**

Here we use a proof by induction. Consider the case where  $x$  is even. Let  $n = a\left(\frac{x}{2} - p\right)$  (for any defined value of  $p$ ,  $n$  will be some non-negative integer value). Condition 3 can be rewritten as:

$$(4) \quad F\left(\frac{ax}{2}, t + 1\right) \geq \frac{F\left(\frac{ax}{2} - n, t + 1\right) + F\left(\frac{ax}{2} + n, t + 1\right)}{2}$$

Here, we will consider all non-negative integer values of  $n$  (even those that don't correspond to an integer value of  $p$ ). Condition 4 clearly holds for  $n = 0$ . Additionally, it holds for  $n = 1$  because condition 2 can be rewritten (with  $x$  replaced by  $\frac{ax}{2}$ ) as

$$(5) \quad F\left(\frac{ax}{2}, t + 1\right) \geq \frac{F\left(\frac{ax}{2} - 1, t + 1\right) + F\left(\frac{ax}{2} + 1, t + 1\right)}{2}$$

We now assume that condition 4 holds for  $n$  and show that it must hold for  $n + 1$ . If  $F(x, t + 1)$  is a concave function, then we are guaranteed

$$(6) \quad F(x - 1, t + 1) \leq 2F(x, t + 1) - F(x + 1, t + 1)$$

$$(7) \quad F(x + 1, t + 1) \leq 2F(x, t + 1) - F(x - 1, t + 1)$$

Using conditions 6 and 7, the following holds:

$$(8) \quad \frac{F\left(\frac{ax}{2} + (n+1), t+1\right) + F\left(\frac{ax}{2} - (n+1), t+1\right)}{2} \leq F\left(\frac{ax}{2} + n, t+1\right) + F\left(\frac{ax}{2} - n, t+1\right) - \frac{F\left(\frac{ax}{2} + (n-1), t+1\right) + F\left(\frac{ax}{2} - (n-1), t+1\right)}{2}$$

The following condition holds

$$(9) \quad \frac{F\left(\frac{ax}{2} + n, t+1\right) + F\left(\frac{ax}{2} - n, t+1\right)}{2} - \frac{F\left(\frac{ax}{2} + (n-1), t+1\right) + F\left(\frac{ax}{2} - (n-1), t+1\right)}{2} \leq 0$$

To show condition 9, we note that condition 7 ensures

$$(10) \quad F\left(\frac{ax}{2} + n, t+1\right) - F\left(\frac{ax}{2} + (n-1), t+1\right) + F\left(\frac{ax}{2} - n, t+1\right) - F\left(\frac{ax}{2} - (n-1), t+1\right) \leq F\left(\frac{ax}{2} + (n-1), t+1\right) - F\left(\frac{ax}{2} + (n-2), t+1\right) + F\left(\frac{ax}{2} - n, t+1\right) - F\left(\frac{ax}{2} - (n-1), t+1\right)$$

However condition 7 also ensures

$$(11) \quad F\left(\frac{ax}{2} + (n-1), t+1\right) - F\left(\frac{ax}{2} + (n-2), t+1\right) + F\left(\frac{ax}{2} - n, t+1\right) - F\left(\frac{ax}{2} - (n-1), t+1\right) \leq F\left(\frac{ax}{2} + (n-2), t+1\right) - F\left(\frac{ax}{2} + (n-3), t+1\right) + F\left(\frac{ax}{2} - n, t+1\right) - F\left(\frac{ax}{2} - (n-1), t+1\right)$$

And the same substitution can be repeatedly applied, which yields

$$(12) \quad F\left(\frac{ax}{2} + n, t+1\right) - F\left(\frac{ax}{2} + (n-1), t+1\right) + F\left(\frac{ax}{2} - n, t+1\right) - F\left(\frac{ax}{2} - (n-1), t+1\right) \leq F\left(\frac{ax}{2} - (n-1), t+1\right) - F\left(\frac{ax}{2} - n, t+1\right) + F\left(\frac{ax}{2} - n, t+1\right) - F\left(\frac{ax}{2} - (n-1), t+1\right) = 0$$

Thus, condition 9 follows.

Condition 9 shows that condition 8 can be rewritten as

$$(13) \quad \frac{F\left(\frac{ax}{2} + (n+1), t+1\right) + F\left(\frac{ax}{2} - (n+1), t+1\right)}{2} \leq \frac{F\left(\frac{ax}{2} + n, t+1\right) + F\left(\frac{ax}{2} - n, t+1\right)}{2}$$

Given that we are assuming that condition 4 holds for  $n$ , it now follows

$$(14) \quad \frac{F\left(\frac{ax}{2} + (n+1), t+1\right) + F\left(\frac{ax}{2} - (n+1), t+1\right)}{2} \leq F\left(\frac{ax}{2}, t+1\right)$$

Thus, condition 4 holds for  $n+1$ . Thus, this condition will hold for all integer values of  $n$ , which certainly ensures that it will hold for all integer values of  $p$  (where  $0 \leq p \leq \frac{x}{2}$ ). The case where  $x$  is odd follows a similar argument. This completes the proof. ■

Condition 4 is essentially an instance of Jensen's inequality. Using Eq. 1 and condition 3,

$$(15) \quad F(x, t) = \begin{cases} 2F\left(\frac{ax}{2}, t+1\right) & \text{if } x \text{ is even} \\ F\left(\frac{a(x+1)}{2}, t+1\right) + F\left(\frac{a(x-1)}{2}, t+1\right) & \text{if } x \text{ is odd} \end{cases}$$

Suppose that  $x$  is even; then Eq. 15 ensures

$$(16) \quad \begin{aligned} (F(x, t) - F(x-1, t)) - (F(x-1, t) - F(x-2, t)) &= 2F\left(\frac{ax}{2}, t+1\right) - 2F\left(\frac{ax}{2}, t+1\right) \\ &\quad - 2F\left(\frac{a(x-2)}{2}, t+1\right) + 2F\left(\frac{a(x-2)}{2}, t+1\right) \\ &= 0 \end{aligned}$$

Suppose that  $x$  is odd; then Eq. 15 ensures  
(17)

$$\begin{aligned}
(F(x, t) - F(x - 1, t)) - (F(x - 1, t) - F(x - 2, t)) &= F\left(\frac{a(x + 1)}{2}, t + 1\right) + F\left(\frac{a(x - 1)}{2}, t + 1\right) \\
&\quad - 2F\left(\frac{a(x - 1)}{2}, t + 1\right) - 2F\left(\frac{a(x - 1)}{2}, t + 1\right) \\
&\quad + F\left(\frac{a(x - 1)}{2}, t + 1\right) + F\left(\frac{a(x - 3)}{2}, t + 1\right) \\
&= \left[ F\left(\frac{a(x + 1)}{2}, t + 1\right) - F\left(\frac{a(x - 1)}{2}, t + 1\right) \right] \\
&\quad - \left[ F\left(\frac{a(x - 1)}{2}, t + 1\right) - F\left(\frac{a(x - 3)}{2}, t + 1\right) \right]
\end{aligned}$$

Because  $F(x, t + 1)$  is concave by assumption, this means that the right-hand side of Eq. 17 is less than or equal to zero; thus, for all relevant  $x$

$$(18) \quad (F(x, t) - F(x - 1, t)) - (F(x - 1, t) - F(x - 2, t)) \leq 0$$

This means that if  $F(x, t + 1)$  is concave over integer values of  $x$ , then  $F(x, t)$  will be as well. Thus, if  $F(x, T) = S(x)$  is concave, then  $F(x, t)$  will be concave for all values of  $t$ . This means that there will be no better strategy than splitting the group into two equal pieces (or as close as possible).

If it were possible for  $F(x, t + 1)$  to be convex for all integer values ( $(F(x + 1, t + 1) - F(x, t + 1)) - (F(x, t + 1) - F(x - 1, t + 1)) \geq 0$ ), then a similar argument would show that  $F(x, t)$  will be convex as well. In such a case, it would be best for the cluster not to split at all ( $p = 0$  is the optimal value). Given that  $S(x)$  is a probability (and thus bounded at unity) this function cannot be convex for all values of  $x$ . Therefore, if  $F(x, T) = S(x)$ , then it will generally not be the case that  $F(x, t)$  is convex for arbitrary values of  $x$  and  $t$ . It is possible for  $S(x)$  (and  $F(x, t)$ ) to be convex for some values of  $x$  and concave for other values. In such a case, it is possible for the optimal division strategy to depend on size and time. For instance, in Figure S1, the results of a program to calculate the optimal division values ( $p$  as a function of  $x$  and  $t$ ) using Eq. 1 are given for a set of different functions for  $F(x, T)$  (in the figure, we do impose a maximum size for a cluster). Thus, we see that there are circumstances where a cluster should not divide at certain sizes and divide evenly at other sizes.
